# Supplementary material
Source: PubMed Central journal article supplement (PMC8575510)
Supplement: Fraze.pdf [file Fraze.pdf]

## Supplemental materials for

Fraze TK, Beidler LB, Fichtenberg C, Brewster AL, Gottlieb LM. Resource brokering: efforts to assist patients with housing, transportation, and economic needs in primary care settings. *Ann Fam Med*. 2021;19(6):507-514.

Supplemental Table 1: Interviewee Categories

| <b>Interviewee Categories</b> | <b>Description</b>                                                                                          | <b>Examples</b>                                                       |
|-------------------------------|-------------------------------------------------------------------------------------------------------------|-----------------------------------------------------------------------|
| Executive Leadership          | Individuals primarily responsible for overseeing the operations of the entire organization                  | Chief Executive Officer, Chief Clinical Officer                       |
| Program Management            | Individuals who oversee specific departments or services                                                    | Program Manager, Community Relations Manager, Eligibility Supervisor  |
| Case Management Staff         | Individuals who worked within case management teams and who focused primarily on case management activities | Nurse Care Manager, Community Health Worker, Social Worker, Navigator |
| Practicing Clinician          | Individuals whose primary role was the provision of medical care                                            | Physician                                                             |

Supplemental Table 2: Organizational Characteristics

| Number | Description                                                                    | Composition                                          | Number of interviews | Interviewee(s) Category <sup>1,2</sup>                                     | Reason for second interview                                                                                                                      |
|--------|--------------------------------------------------------------------------------|------------------------------------------------------|----------------------|----------------------------------------------------------------------------|--------------------------------------------------------------------------------------------------------------------------------------------------|
| 1      | Urban family medicine clinic in the Midwest (10 to 20 providers)               | Single primary care delivery site                    | 1                    | Program Management                                                         |                                                                                                                                                  |
| 2      | Health system in the Northeast                                                 | Hospital, primary care and specialty delivery sites  | 1                    | Program Management (2)                                                     |                                                                                                                                                  |
| 3      | Coalition of community health centers in the West                              | Primary care delivery sites                          | 1                    | Executive Leadership, Program Management                                   |                                                                                                                                                  |
| 4      | Health system in the West                                                      | Hospitals, primary care and specialty delivery sites | 1                    | Executive Leadership                                                       |                                                                                                                                                  |
| 5      | Health system in the West                                                      | Hospitals, primary care and specialty delivery sites | 1                    | Executive Leadership                                                       |                                                                                                                                                  |
| 6      | Rural FQHC in an area that covers two states in the South (1 to 10 providers)  | Single primary care delivery site                    | 1                    | Executive Leadership                                                       |                                                                                                                                                  |
| 7      | Health system in the Northeast                                                 | Hospitals, primary care and specialty delivery sites | 1                    | Executive Leadership, Program Management (2)                               |                                                                                                                                                  |
| 8      | Rural healthcare system that includes hospitals in two states in the Northeast | Hospitals, primary care and specialty delivery sites | 2                    | Executive Leadership, Program Management/Practicing Clinician <sup>3</sup> | First interviewee suggested that the second interviewee may have additional insight as a practicing clinician involved in program implementation |
| 9      | Suburban FQHC with multiple clinical delivery sites in the West                | Primary and specialty care delivery sites            | 1                    | Program Management                                                         |                                                                                                                                                  |
| 10     | Urban FQHC with multiple                                                       | Primary and specialty care delivery sites            | 1                    | Program Management                                                         |                                                                                                                                                  |

|    |                                                                            |                                                                   |   |                                                                 |                                                                                                                                |
|----|----------------------------------------------------------------------------|-------------------------------------------------------------------|---|-----------------------------------------------------------------|--------------------------------------------------------------------------------------------------------------------------------|
|    | locations in the West                                                      |                                                                   |   |                                                                 |                                                                                                                                |
| 11 | Accountable care organization in the Northeast                             | Hospitals, primary care and specialty delivery sites              | 1 | Executive Leadership                                            |                                                                                                                                |
| 12 | Large health system in the Northeast that also manages its own health plan | Hospitals, primary care and specialty delivery sites; health plan | 2 | Executive Leadership, Case Management Staff                     | First interview discussed program goals across the system. Secondary interview provided details on the case management process |
| 13 | Small rural practice in the Northeast                                      | Single primary care delivery site                                 | 1 | Program Management (2), Practicing Clinician                    |                                                                                                                                |
| 14 | Large suburban FQHC in the South                                           | Primary care delivery sites                                       | 1 | Executive Leadership, Program Management, Case Management Staff |                                                                                                                                |
| 15 | FQHC suburban in the West                                                  | Primary and specialty care delivery sites                         | 1 | Program Management                                              |                                                                                                                                |
| 16 | Urban practice in the West (less than 10 providers)                        | Single primary care delivery site                                 | 1 | Case Management Staff                                           |                                                                                                                                |
| 17 | Rural community health center in the Midwest (20 to 40 providers)          | Primary care delivery sites                                       | 1 | Case Management Staff                                           |                                                                                                                                |
| 18 | Rural community health center in the West                                  | Primary care delivery sites                                       | 1 | Program Management                                              |                                                                                                                                |
| 19 | Health system in the Midwest                                               | Hospitals, primary care and specialty delivery sites              | 1 | Program Management (2)                                          |                                                                                                                                |
| 20 | Urban system in the Northeast                                              | Hospitals, primary care and specialty delivery sites              | 1 | Executive Leadership, Program Management                        |                                                                                                                                |
| 21 | Suburban community                                                         | Primary care delivery sites                                       | 2 | Executive Leadership,                                           | First interviewee suggested that                                                                                               |

|    |                                                                      |                                                      |   |                                              |                                                                                                                                                   |
|----|----------------------------------------------------------------------|------------------------------------------------------|---|----------------------------------------------|---------------------------------------------------------------------------------------------------------------------------------------------------|
|    | health center in the West                                            |                                                      |   | Program Management                           | second interviewee would be able to explain details to implementation of the programming within clinics                                           |
| 22 | Health system in the Northeast                                       | Hospitals, primary care and specialty delivery sites | 1 | Executive Leadership                         |                                                                                                                                                   |
| 23 | Health system in the Northeast                                       | Hospitals, primary care and specialty delivery sites | 2 | Program Management                           | First interviewee provided an overview of broad strategic goals, secondary interviewee explained the details of program design and implementation |
| 24 | Health system in the Midwest                                         | Hospitals, primary care and specialty delivery sites | 1 | Executive Leadership, Program Management (2) |                                                                                                                                                   |
| 25 | Health system in the South                                           | Hospitals, primary care and specialty delivery sites | 1 | Program Management                           |                                                                                                                                                   |
| 26 | Urban community health center in the South                           | Primary care delivery sites                          | 1 | Executive Leadership                         |                                                                                                                                                   |
| 27 | Urban FQHC in the Midwest (20 to 50 providers)                       | Single primary care delivery                         | 1 | Executive Leadership                         |                                                                                                                                                   |
| 28 | Rural independent practice in the Northeast (less than 10 providers) | Single primary care delivery site                    | 1 | Practicing clinician                         |                                                                                                                                                   |

1: Number in parentheses indicates the number of individuals within each category

2: Categories are defined in Appendix Table 1

3: Interviewee was both a practicing clinician as well as involved in program management

Supplemental Table 3: Interview Guide Domains

| Domain                         | Sub-domains                                                                                                                                                                                                                                                                                                                                                                                                                                                                                                                                                                                                                                             |
|--------------------------------|---------------------------------------------------------------------------------------------------------------------------------------------------------------------------------------------------------------------------------------------------------------------------------------------------------------------------------------------------------------------------------------------------------------------------------------------------------------------------------------------------------------------------------------------------------------------------------------------------------------------------------------------------------|
| Organizational Characteristics | <ul style="list-style-type: none"> <li>• Organization size and structure</li> <li>• Interviewee role</li> <li>• Motivations for social needs work</li> <li>• Populations served</li> <li>• Participation in delivery reforms</li> </ul>                                                                                                                                                                                                                                                                                                                                                                                                                 |
| Screening                      | <ul style="list-style-type: none"> <li>• Which patients screened</li> <li>• Needs screened for</li> <li>• Screening workflows, methods, tools used</li> <li>• Staff involved with screening</li> <li>• Follow-up processes</li> <li>• Access to screening results</li> <li>• Frequency of screening</li> <li>• Reason for starting screening</li> <li>• Development of screening program</li> <li>• Engagement with clinicians</li> <li>• Buy-in from staff</li> <li>• Plans for scaling, changing screening program</li> <li>• Common needs patients have</li> </ul>                                                                                   |
| Referrals                      | <ul style="list-style-type: none"> <li>• Workflow</li> <li>• Staff involved</li> <li>• Tailoring to patients</li> <li>• Variation between locations, patients</li> <li>• Referral lists, referral platforms               <ul style="list-style-type: none"> <li>○ Development</li> <li>○ Maintenance</li> <li>○ Staff involved</li> <li>○ Tracking use of referrals</li> </ul> </li> <li>• Role of clinicians</li> <li>• Buy-in from clinicians and patients</li> <li>• Follow-up processes</li> <li>• Closed loop referrals</li> <li>• Common challenges with referrals</li> </ul>                                                                    |
| Assistance                     | <ul style="list-style-type: none"> <li>• Workflow</li> <li>• Types of assistance offered</li> <li>• Staff involved</li> <li>• Staff training</li> <li>• Variation between patients</li> <li>• Engagement with community organizations</li> <li>• Communication with               <ul style="list-style-type: none"> <li>○ Patients</li> <li>○ Clinicians</li> <li>○ Other staff</li> </ul> </li> <li>• Centralized vs. decentralized programs</li> <li>• Tracking of patients/data collection</li> <li>• Common challenges</li> <li>• Reason for starting assistance work</li> <li>• Program development</li> <li>• Changes made to program</li> </ul> |

|                                                                        |                                                                                                                                                                                                                                                                                                                                                                                                                         |
|------------------------------------------------------------------------|-------------------------------------------------------------------------------------------------------------------------------------------------------------------------------------------------------------------------------------------------------------------------------------------------------------------------------------------------------------------------------------------------------------------------|
| <p>Need specific programming (e.g., food, housing, transportation)</p> | <ul style="list-style-type: none"> <li>• Internal programs</li> <li>• External programs</li> <li>• Funding</li> <li>• Services</li> <li>• Types of patients</li> <li>• Development processes</li> </ul>                                                                                                                                                                                                                 |
| <p>Interactions with community-based organizations (CBOs)</p>          | <ul style="list-style-type: none"> <li>• Types of partners</li> <li>• Role of: <ul style="list-style-type: none"> <li>○ Health care organization</li> <li>○ CBO</li> </ul> </li> <li>• History of partnerships</li> <li>• Involvement of CBO in program development</li> <li>• Formalized or ad-hoc</li> <li>• Contractual relationships</li> <li>• Types of patients served</li> <li>• Data/records sharing</li> </ul> |
| <p>Overview/Reflection</p>                                             | <ul style="list-style-type: none"> <li>• Challenges faced</li> <li>• Challenges solved</li> <li>• Overlap with care management</li> <li>• Organizational buy-in</li> <li>• Advice for other organizations</li> <li>• Organizational goals</li> <li>• Needed support (financial, resources, policy)</li> </ul>                                                                                                           |
